# Supplementary material
Source: PubMed Central journal article supplement (PMC6825831)
Supplement: nxz157_supplemental_file.pdf [file nxz157_supplemental_file.pdf]

**Supplemental Table 1**

Differences in birth size, maternal and household characteristics between children with complete measurements vs. missing body composition from the POSGRAD cohort at follow-up 8-10 years of age<sup>1</sup>.

|                                  | <b>Included</b>  | <b>Excluded</b> | <b>P-value<sup>a</sup></b> |
|----------------------------------|------------------|-----------------|----------------------------|
|                                  | <b>Mean ± SD</b> |                 |                            |
|                                  | <b>n = 536</b>   | <b>n = 510</b>  |                            |
| <b>Child Characteristics</b>     |                  |                 |                            |
| <i>Birth weight, kg</i>          | 3.22 ± 0.47      | 3.17 ± 0.47     | 0.04                       |
| <i>Birth height, cm</i>          | 50.37 ± 2.39     | 50.15 ± 2.65    | 0.18                       |
| <i>Parity</i>                    | N (%)            |                 |                            |
| 1 <sup>st</sup> child            | 203 (38)         | 195 (38)        | 0.90                       |
| >= 2 <sup>nd</sup> child         | 333 (62)         | 315 (62)        |                            |
| <b>Maternal Characteristics</b>  |                  |                 |                            |
| <i>Age, y</i>                    | 26.67 ± 4.71     | 25.80 ± 5.66    | 0.01                       |
| <i>Schooling, y</i>              | 12.98 ± 3.53     | 11.93 ± 3.54    | 0.83                       |
| <b>Household Characteristics</b> |                  |                 |                            |
| <b>SES</b>                       | N (%)            |                 |                            |
| 1 <i>Lowest</i>                  | 158 (29)         | 196 (35)        | 0.08                       |
| 2                                | 179 (34)         | 176 (33)        |                            |
| 3 <i>Highest</i>                 | 199 (37)         | 179 (32)        |                            |

<sup>11</sup>Values are means ± SDs unless otherwise stated. P values are for chi-square tests (categorical variables) or t tests (continuous variables). POSGRAD, Prenatal Omega-3 Fatty Acid Supplementation and Child Growth and Development; SES,

Supplementary data

**Supplemental Table 2**

Fit Statistics for the Candidate Latent Class Growth Height and Weight Models, by Sex, in the POSGRAD cohort at follow-up 8-10 years of age.

| Fit Statistics       | Height                  |         |         |                        |         |         |
|----------------------|-------------------------|---------|---------|------------------------|---------|---------|
|                      | Girls ( <i>n</i> = 255) |         |         | Boys ( <i>n</i> = 281) |         |         |
|                      | 2 Class                 | 3 Class | 4 Class | 2 Class                | 3 Class | 4 Class |
| Log likelihood       | -7,095                  | -6,983  | -6,933  | -7,685                 | -7,600  | -7,557  |
| BIC                  | 14,279                  | 14,070  | 13,987  | 15,460                 | 15,307  | 15,239  |
| Entropy              | 0.79                    | 0.86    | 0.86    | 0.82                   | 0.83    | 0.84    |
| LMR test             | 406.9                   | 212.6   | 94.1    | 469.7                  | 160.6   | 80.3    |
| LMR, <i>P</i> value  | 0.02                    | 0.11    | 0.19    | 0.0003                 | 0.02    | 0.12    |
| BLRT test            | -7,310                  | -7,095  | -6,982  | -7,933                 | -7,684  | -7600   |
| BLRT, <i>P</i> value | <0.0001                 | <0.0001 | <0.0001 | <0.0001                | <0.0001 | <0.0001 |

Abbreviations: BIC, Bayesian Information Criterion; LMR, Lo-Mendell-Rubin Likelihood Ratio Test; BLRT, Bootstrap Likelihood Ratio Test.
